# Supplementary material
Source: HighWire-hosted journal article supplement (https://msystems.asm.org/content/2/1/e00162-16)

a

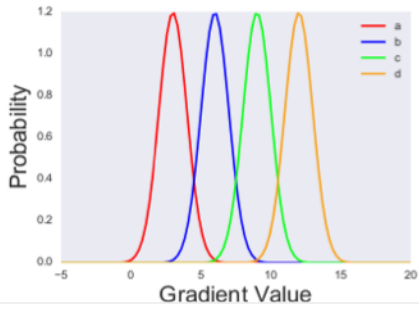

b

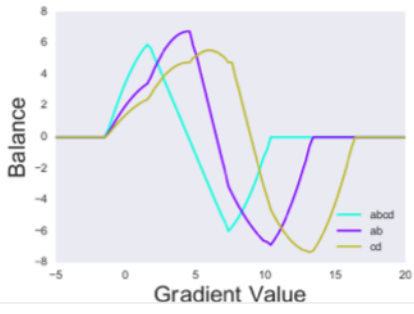

c

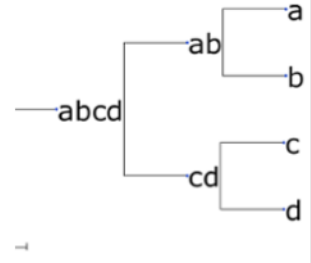

Supplement: inline-supplementary-material-4 [file inline-supplementary-material-4.pdf]
